# Supplementary material for: Whole transcriptome characterization of the effects of dehydration and rehydration on Cladonia rangiferina, the grey reindeer lichen
Source: PubMed Central journal article supplement (PMC3878897; doi:10.1186/1471-2164-14-870), 2013-12-10

global

0.8301

9.5094

18.1887

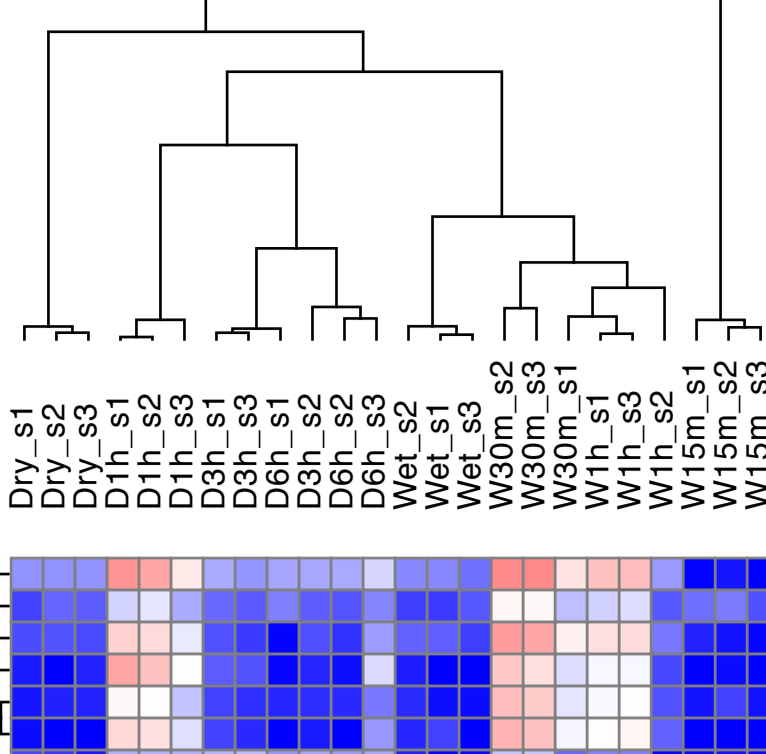

| FeatureNum | Description                                                                                                 |
|------------|-------------------------------------------------------------------------------------------------------------|
| 30920      | 40S ribosomal protein S6-B                                                                                  |
| 19479      | 3-oxoacyl-[acyl-carrier-protein] reductase                                                                  |
| 5300       | beta-glucosidase, putative                                                                                  |
| 18560      | cytochrome P450 monooxygenase                                                                               |
| 6031       | beta-glucosidase, putative                                                                                  |
| 16199      | Golgi membrane protein (Coy1), putative                                                                     |
| 33833      | disulfide isomerase (TigA), putative                                                                        |
| 10635      | alcohol dehydrogenase, putative                                                                             |
| 15747      | mitosis protein dim1                                                                                        |
| 29277      | para-hydroxybenzoate-polyprenyltransferase Coq2, putative                                                   |
| 12107      | ribosomal large subunit biogenesis protein MAK16, putative                                                  |
| 32428      | 15-hydroxyprostaglandin dehydrogenase, putative                                                             |
| 17698      | 60S ribosomal protein L23                                                                                   |
| 1852       | ATP-binding cassette sub-family A member 7                                                                  |
| 32982      | cytochrome C1/Cy1t1, putative                                                                               |
| 28093      | CD4-specific ankyrin repeat protein D5.1                                                                    |
| 1951       | homoserine acetyltransferase family protein                                                                 |
| 6600       | short chain dehydrogenase/reductase                                                                         |
| 45036      | acetyl-hydrolase                                                                                            |
| 34936      | lipase-esterase                                                                                             |
| 34442      | DNA binding protein SART-1                                                                                  |
| 40852      | molecular chaperone                                                                                         |
| 24516      | cytochrome oxidase subunit 1                                                                                |
| 24941      | actin family protein                                                                                        |
| 23929      | Cytochrome P450 family protein                                                                              |
| 19656      | elongation factor 1-beta                                                                                    |
| 39612      | guanine nucleotide-binding protein beta polypeptide 2-like 1                                                |
| 40119      | oxidoreductase domain containing protein                                                                    |
| 14228      | 82 kDa heat shock protein                                                                                   |
| 3287       | argonaute-like protein                                                                                      |
| 21034      | elongation factor 1-alpha                                                                                   |
| 28654      | ferritin                                                                                                    |
| 23585      | Conserved Germline Helicase family member                                                                   |
| 27902      | cytochrome oxidase subunit III                                                                              |
| 16429      | putative cyclophilin                                                                                        |
| 44311      | cytochrome b                                                                                                |
| 39819      | phosphoglucumutase                                                                                          |
| 36278      | protein-methionine-S-oxide reductase                                                                        |
| 19869      | acid phosphatase phoG                                                                                       |
| 18491      | HATase_c domain-containing protein                                                                          |
| 9056       | TOR signaling pathway phosphatase SitA                                                                      |
| 22829      | putative glucose-fructose oxidoreductase oxidoreductase protein                                             |
| 7236       | FK506-binding protein 2 precursor/ peptidyl-prolyl cis-trans isomerase, putative                            |
| 23922      | MFS transporter, putative                                                                                   |
| 18060      | type I phosphodiesterase/nucleotide pyrophosphatase                                                         |
| 34248      | acyl-CoA dehydrogenase                                                                                      |
| 13586      | farnesyl-pyrophosphate synthetase                                                                           |
| 34864      | translocation elongation factor                                                                             |
| 25455      | integral membrane protein                                                                                   |
| 24272      | interferon-induced, double-stranded RNA-activated protein kinase                                            |
| 41484      | N-ethylmaleimide sensitive fusion protein                                                                   |
| 10235      | bZIP transcription factor HacA                                                                              |
| 19014      | actin binding protein                                                                                       |
| 40682      | oxidoreductase, short chain dehydrogenase, putative                                                         |
| 41383      | oxidoreductase domain containing protein                                                                    |
| 18160      | Ubiquitin E2 (conjugating enzyme) variant family member                                                     |
| 8267       | tryptophan synthase                                                                                         |
| 42317      | alanine aminotransferase                                                                                    |
| 20117      | helicase, putative                                                                                          |
| 8844       | membrane-spanning ATPase                                                                                    |
| 29776      | mitochondrial molecular chaperone (Atp12)                                                                   |
| 23320      | short-chain dehydrogenase, putative                                                                         |
| 40187      | Paal_1 thioesterase family protein, putative                                                                |
| 40337      | Paal_2 thioesterase family protein, putative                                                                |
| 37052      | protein kinase domain-containing protein                                                                    |
| 42827      | 26S protease regulatory subunit 8                                                                           |
| 42273      | 40S ribosomal protein S4                                                                                    |
| 19265      | inositol 5-phosphatase, putative                                                                            |
| 21987      | imidazole glycerol phosphate synthase hisHF                                                                 |
| 41264      | NACHT domain protein                                                                                        |
| 21666      | WD-repeat protein, putative                                                                                 |
| 16129      | covalently-linked cell wall protein                                                                         |
| 26554      | ankyrin repeat protein                                                                                      |
| 45115      | ankyrin repeat S-palmitoyl transferase                                                                      |
| 2993       | pathogenesis associated protein Cap20, putative                                                             |
| 36726      | benzoate 4-monoxygenase cytochrome P450                                                                     |
| 12584      | para-hydroxybenzoate-polyprenyltransferase Coq2, putative                                                   |
| 1681       | U5 snRNP component (116 kDa), putative                                                                      |
| 33970      | MFS monosaccharide transporter, putative                                                                    |
| 38984      | peptide methionine sulfoxide reductase A                                                                    |
| 9267       | polyprotein                                                                                                 |
| 18056      | ATP dependent RNA helicase (Sub2), putative                                                                 |
| 40193      | integral membrane protein                                                                                   |
| 4840       | 3,4-dihydroxy-2-butanone 4-phosphate synthase                                                               |
| 920        | 30 kDa heat shock protein                                                                                   |
| 11152      | C6 transcription factor, putative                                                                           |
| 12378      | pyruvate formate lyase activating enzyme, putative                                                          |
| 32631      | bifunctional dihydrofolate reductase-thymidylate synthase                                                   |
| 11832      | FAD-dependent pyridine nucleotide-disulfide oxidoreductase                                                  |
| 16494      | copA-type polyprotein                                                                                       |
| 35429      | DNA-directed RNA polymerase III subunit RPC10, putative                                                     |
| 28950      | histone h2a, putative                                                                                       |
| 21669      | Ornithine decarboxylase antizyme                                                                            |
| 42128      | eukaryotic translation initiation factor 1A                                                                 |
| 16296      | benzoate 4-monoxygenase cytochrome P450                                                                     |
| 10909      | Cytochrome P450 family protein                                                                              |
| 38821      | FAD binding domain containing protein                                                                       |
| 719        | sterigmatocystin 8-O-methyltransferase precursor, putative                                                  |
| 28304      | sterol 14 alpha-demethylase ERG11                                                                           |
| 28827      | alpha-glucosidase                                                                                           |
| 41722      | ankyrin repeat-containing protein, putative                                                                 |
| 2943       | G2-specific protein kinase NimA                                                                             |
| 38455      | amino acid transporter                                                                                      |
| 10489      | DNA repair protein rad5                                                                                     |
| 43825      | small nucleolar ribonucleoprotein complex subunit, putative                                                 |
| 5090       | ethanolamine kinase                                                                                         |
| 5664       | nitrogen metabolite repression regulator NmrA                                                               |
| 16800      | cercosporin toxin biosynthesis protein                                                                      |
| 19243      | haloacid dehalogenase                                                                                       |
| 6307       | hexokinase                                                                                                  |
| 44067      | calpain-like protein                                                                                        |
| 21217      | alpha-glucosidase                                                                                           |
| 26510      | GPI ethanolamine phosphate transferase                                                                      |
| 42967      | HLA class III protein Dom3z                                                                                 |
| 35776      | MFS monosaccharide transporter, putative                                                                    |
| 26047      | cation diffusion facilitator 10                                                                             |
| 28161      | ankyrin repeat-containing protein, putative                                                                 |
| 32796      | glucose oxidase                                                                                             |
| 40347      | L-amino acid oxidase                                                                                        |
| 1235       | ankyrin repeat protein                                                                                      |
| 25350      | FAD binding domain containing protein                                                                       |
| 4179       | NACHT domain protein                                                                                        |
| 10019      | homocitrate synthase                                                                                        |
| 12973      | XPG I-region protein                                                                                        |
| 34824      | NADH oxidase                                                                                                |
| 30200      | peroxisomal membrane protein                                                                                |
| 16490      | receptor-interacting serine/threonine-protein kinase                                                        |
| 35832      | phospholipase                                                                                               |
| 18764      | kynurenine 3-monoxygenase                                                                                   |
| 25100      | 20S proteasome alpha subunit E                                                                              |
| 19926      | protein kinase                                                                                              |
| 14867      | transcription initiation factor TFIID subunit 13, putative                                                  |
| 32814      | transcriptional repressor TupA/RocA, putative                                                               |
| 12931      | 26S protease regulatory subunit, putative                                                                   |
| 38776      | glycosyltransferase                                                                                         |
| 23604      | PIs, NACHT and WD domain protein                                                                            |
| 15693      | dynamin GTPase                                                                                              |
| 30307      | major royal jelly protein                                                                                   |
| 40014      | ribosomal protein L37                                                                                       |
| 14962      | MYB DNA binding protein (Tb1), putative                                                                     |
| 21156      | SERAC1                                                                                                      |
| 31490      | white collar-2                                                                                              |
| 3567       | LysM domain protein                                                                                         |
| 25554      | ribonuclease p/mrp subunit, putative                                                                        |
| 25773      | Ser/Thr protein phosphatase family protein                                                                  |
| 28347      | benzoate 4-monoxygenase cytochrome P450                                                                     |
| 19604      | WD domain, G-beta repeat containing protein                                                                 |
| 39323      | G-protein alpha subunit Cga2                                                                                |
| 28195      | potassium transporter, putative                                                                             |
| 8567       | 60S ribosomal protein L10-B                                                                                 |
| 37954      | bZIP transcription factor HacA                                                                              |
| 5274       | methyltransferase, putative                                                                                 |
| 10530      | heat shock protein 101                                                                                      |
| 23080      | heat shock protein HSP98                                                                                    |
| 28847      | heat shock protein                                                                                          |
| 3408       | chaperonin                                                                                                  |
| 4471       | hsp70                                                                                                       |
| 6262       | heat shock protein Hsp98/Hsp104/C1pA, putative                                                              |
| 3200       | heat shock protein Hsp98/Hsp104/C1pA, putative                                                              |
| 40542      | heat shock protein Hsp98/Hsp104/C1pA, putative                                                              |
| 25422      | cytochrome b                                                                                                |
| 22356      | myosin alkali light chain                                                                                   |
| 35921      | cathepsin L2 cysteine protease                                                                              |
| 17842      | translation elongation factor 1-alpha                                                                       |
| 6556       | translational elongation factor 1a                                                                          |
| 15660      | amino acid transporter, putative                                                                            |
| 13172      | ubiquitin-like protein DskB, putative                                                                       |
| 23655      | Ferric reductase NAD binding domain containing protein                                                      |
| 7724       | Hsp70 nucleotide exchange factor (Fes1), putative                                                           |
| 14563      | mitochondrial intermembrane space protein Mia40                                                             |
| 14563      | mitochondrial intermembrane space protein Mia40                                                             |
| 21975      | putative senescence-associated protein                                                                      |
| 24204      | cytochrome P450, putative                                                                                   |
| 15972      | guanosine polyphosphate pyrophosphohydrolase/synthetase-like protein                                        |
| 3456       | polyketide synthase, putative                                                                               |
| 16534      | integral membrane protein                                                                                   |
| 25949      | phoma betae P450 monooxygenase No.2                                                                         |
| 28667      | amino acid permease, putative                                                                               |
| 20735      | mitochondrial intermediate peptidase                                                                        |
| 30416      | siroheme synthase                                                                                           |
| 39148      | siroheme synthase                                                                                           |
| 40975      | sorting nexin-3                                                                                             |
| 12557      | ion channel                                                                                                 |
| 2502       | ion channel                                                                                                 |
| 25152      | siroheme synthase, putative                                                                                 |
| 13298      | 30 kDa heat shock protein                                                                                   |
| 16482      | 30 kDa heat shock protein                                                                                   |
| 15237      | nitrite reductase                                                                                           |
| 9591       | nitrite reductase                                                                                           |
| 41607      | mitochondrial carrier protein, putative                                                                     |
| 32351      | mitochondrial intermembrane space translocase subunit Tim10, putative                                       |
| 9606       | transposable element tci transposase, putative                                                              |
| 12362      | mitochondrial carrier protein, putative                                                                     |
| 18710      | phospholipase, patatin family protein                                                                       |
| 35277      | phospholipase, patatin family protein                                                                       |
| 12955      | cation-transporting ATPase                                                                                  |
| 3924       | AMP-binding enzyme, putative                                                                                |
| 35644      | alcohol dehydrogenase                                                                                       |
| 19124      | mitochondrial molecular chaperone (Atp12)                                                                   |
| 19124      | bax inhibitor family protein                                                                                |
| 41910      | bax inhibitor family protein                                                                                |
| 9489       | short chain dehydrogenase (AtsC), putative                                                                  |
| 35877      | alpha-1,3-glucan synthase, putative                                                                         |
| 12007      | dTDP-D-glucose 4,6-dehydratase                                                                              |
| 12639      | dihydroceramide delta(4)-desaturase                                                                         |
| 19091      | Caax farnesyltransferase alpha subunit                                                                      |
| 34843      | non-classical export protein Nce102, putative                                                               |
| 18067      | alpha-1,3-glucan synthase, putative                                                                         |
| 19455      | capsular associated protein                                                                                 |
| 43139      | retromer complex subunit Vps17                                                                              |
| 19300      | Caax prenyl proteinase Rce1                                                                                 |
| 35677      | DNA-directed RNA polymerase II subunit RPB9                                                                 |
| 9421       | serine-rich protein, putative                                                                               |
| 297        | camp independent regulatory protein                                                                         |
| 13245      | glycosyl transferase family 17 protein                                                                      |
| 23427      | glycosyl transferase family 17 protein                                                                      |
| 33259      | glutathione S-transferase omega-like 2                                                                      |
| 19707      | PHD finger domain-containing protein                                                                        |
| 24699      | mitochondrial dynamin GTPase (Msp1)                                                                         |
| 15178      | small nuclear ribonucleoprotein                                                                             |
| 2797       | 3-dehydroshikimate dehydratase, putative                                                                    |
| 36175      | acetylglutamate kinase, putative                                                                            |
| 31536      | 26S proteasome non-ATPase regulatory subunit 13                                                             |
| 8287       | 26S proteasome non-ATPase regulatory subunit 13                                                             |
| 19913      | proteasome regulatory particle subunit Rpt6, putative                                                       |
| 13116      | 37S ribosomal protein Mrp17                                                                                 |
| 43917      | amino acid permease, putative                                                                               |
| 13771      | triosephosphate isomerase                                                                                   |
| 10710      | IFRD domain-containing protein                                                                              |
| 41195      | monocarboxylate permease homologue, mch4                                                                    |
| 15478      | C1p3 chaperone, Hsp100 family                                                                               |
| 25418      | cytosolic probable CTT1-catalase T                                                                          |
| 43555      | senescence-associated protein                                                                               |
| 26859      | 82 kDa heat shock protein                                                                                   |
| 19943      | Hsc70                                                                                                       |
| 30813      | heat shock protein 70b                                                                                      |
| 3051       | polyubiquitin                                                                                               |
| 21473      | ATP-dependent molecular chaperone HSC82                                                                     |
| 34216      | polyketide synthase, putative                                                                               |
| 40727      | heat shock protein Hsp30/Hsp42, putative                                                                    |
| 39293      | mitosis inhibitor protein kinase SWE1                                                                       |
| 22590      | cytosolic probable CTT1-catalase T                                                                          |
| 25315      | mitochondrial peroxiredoxin Prx1, putative                                                                  |
| 22098      | Selenium-binding protein, putative                                                                          |
| 26175      | siroheme synthase                                                                                           |
| 19380      | DNA-directed RNA polymerase III subunit RPC10, putative                                                     |
| 26881      | small nucleolar ribonucleoprotein complex subunit, putative                                                 |
| 24921      | kinase domain containing protein                                                                            |
| 20061      | extracellular matrix protein, putative                                                                      |
| 38212      | mRNA capping enzyme alpha subunit, putative                                                                 |
| 30112      | kinase domain containing protein                                                                            |
| 16772      | serine/threonine protein kinase, putative                                                                   |
| 28310      | polyketide synthase, putative                                                                               |
| 11227      | translation initiation regulator (Gcn20), putative                                                          |
| 40418      | translation initiation regulator (Gcn20), putative                                                          |
| 19321      | citrate synthase (Cit1), putative                                                                           |
| 29012      | GTPase-activating protein GYP7                                                                              |
| 27198      | inositolphosphorylceramide-B C-26 hydroxylase                                                               |
| 12850      | elongation factor G 2                                                                                       |
| 34972      | metacaspase                                                                                                 |
| 28710      | ribosomal small subunit assembly protein, putative                                                          |
| 41271      | type I phosphodiesterase/nucleotide pyrophosphatase                                                         |
| 16724      | oxygen-evolving enhancer protein 3, chloroplast, putative                                                   |
| 5278       | NADH dehydrogenase (quinone), G subunit                                                                     |
| 39093      | ARD/ARD family protein, putative                                                                            |
| 24544      | citrate synthase (Cit1), putative                                                                           |
| 32109      | catechol 1,2-dioxygenase 1                                                                                  |
| 27556      | Histones H3 and H4                                                                                          |
| 4151       | riboflavin aldehyde-forming enzyme                                                                          |
| 40001      | T-complex protein 1, gamma subunit                                                                          |
| 12877      | metacaspase                                                                                                 |
| 36257      | MIPC synthase subunit (SurA), putative                                                                      |
| 13959      | DNA binding protein                                                                                         |
| 35956      | Cytochrome P450 family protein                                                                              |
| 24989      | DDHD domain protein                                                                                         |
| 41054      | DDHD domain protein                                                                                         |
| 18419      | sugar transporter, putative                                                                                 |
| 24310      | sugar transporter, putative                                                                                 |
| 10283      | UDP-glucose 4-epimerase                                                                                     |
| 3394       | 40S ribosomal protein S27                                                                                   |
| 19538      | MFS monosaccharide transporter, putative                                                                    |
| 12960      | nitrogen metabolite repression regulator NmrA                                                               |
| 23682      | D-xylose reductase xyrA                                                                                     |
| 11528      | ribose-phosphate pyrophosphokinase                                                                          |
| 42434      | hydroxyquinol 1,2-dioxygenase                                                                               |
| 42311      | light-harvesting protein of photosystem I                                                                   |
| 28416      | nitrite hydratase, alpha subunit                                                                            |
| 1255       | phytanoyl-CoA dioxygenase family protein                                                                    |
| 14206      | peptidyl-prolyl cis-trans isomerase 11                                                                      |
| 19201      | U3 ribosomal nucleolar protein IMP3                                                                         |
| 12194      | alcohol dehydrogenase                                                                                       |
| 16124      | oxidoreductase, short-chain dehydrogenase/reductase family                                                  |
| 5374       | heat shock protein Hsp20                                                                                    |
| 15279      | cytochrome c peroxidase                                                                                     |
| 12138      | cytochrome c oxidase subunit I                                                                              |
| 36507      | hsp70-like protein                                                                                          |
| 44123      | TPR domain-containing protein                                                                               |
| 10484      | merozoite capping protein-1                                                                                 |
| 24674      | cation-transporting A1Fase                                                                                  |
| 31849      | merozoite capping protein                                                                                   |
| 40740      | Hsp70 nucleotide exchange factor fes1                                                                       |
| 23431      | heat shock protein 70                                                                                       |
| 630        | Hsp70 nucleotide exchange factor fes1                                                                       |
| 19490      | ATP-dependent molecular chaperone HSC82                                                                     |
| 17001      | heat shock protein/chaperonin HSP78                                                                         |
| 8673       | ubiquitin conjugation factor E4                                                                             |
| 21600      | 30 kDa heat shock protein                                                                                   |
| 43975      | 30 kDa heat shock protein                                                                                   |
| 43619      | phosphomannomutase                                                                                          |
| 12981      | SNF2 domain-containing protein / helicase domain-containing protein / RING finger domain-containing protein |
| 27805      | DnaJ domain protein                                                                                         |
| 16890      | ankyrin repeat protein                                                                                      |
| 24698      | MFS monocarboxylate transporter, putative                                                                   |
| 14986      | MFS monocarboxylate transporter, putative                                                                   |
| 40151      | integral membrane protein                                                                                   |
| 15759      | alcohol dehydrogenase                                                                                       |
| 29869      | nuclear pore complex subunit Nup192, putative                                                               |
| 10334      | RTP-binding protein Ychf                                                                                    |
| 32925      | xyitol dehydrogenase XdhB                                                                                   |
| 13862      | GSC complex subunit                                                                                         |
| 21333      | 4-carboxymuconolactone decarboxylase, putative                                                              |
| 6252       | ankyrin repeat protein                                                                                      |
| 38369      | short-chain dehydrogenase                                                                                   |
| 48774      | class 2 transcription repressor NC2                                                                         |
| 6424       | DNA-directed RNA polymerase                                                                                 |
| 33822      | karyopherin                                                                                                 |
| 42609      | karyopherin                                                                                                 |
| 1901       | zinc finger protein OZF                                                                                     |
| 19477      | nuclear pore complex subunit Nup192, putative                                                               |
| 13323      | riboflavin aldehyde-forming enzyme                                                                          |
| 40516      | Swr1p complex component                                                                                     |
| 6481       | Swr1p complex component                                                                                     |
| 16718      | Myc synthase subunit (SurA), putative                                                                       |
| 37713      | YagE family protein                                                                                         |
| 958        | aspartic endopeptidase Pep1                                                                                 |
| 35019      | CoA family metal ion transporter                                                                            |
| 25363      | 15-hydroxyprostaglandin dehydrogenase, putative                                                             |
| 26644      | phenolphthalein synthase polyketide synthase ppsA                                                           |
| 19682      | vacuolar protein sorting vps16, putative                                                                    |
| 29279      | translocation initiation factor IF-2                                                                        |
| 32412      | siroheme synthase, N-terminal domain containing protein                                                     |
| 17457      | siroheme synthase, N-terminal domain containing protein                                                     |
| 22788      | siroheme synthase, N-terminal domain containing protein                                                     |

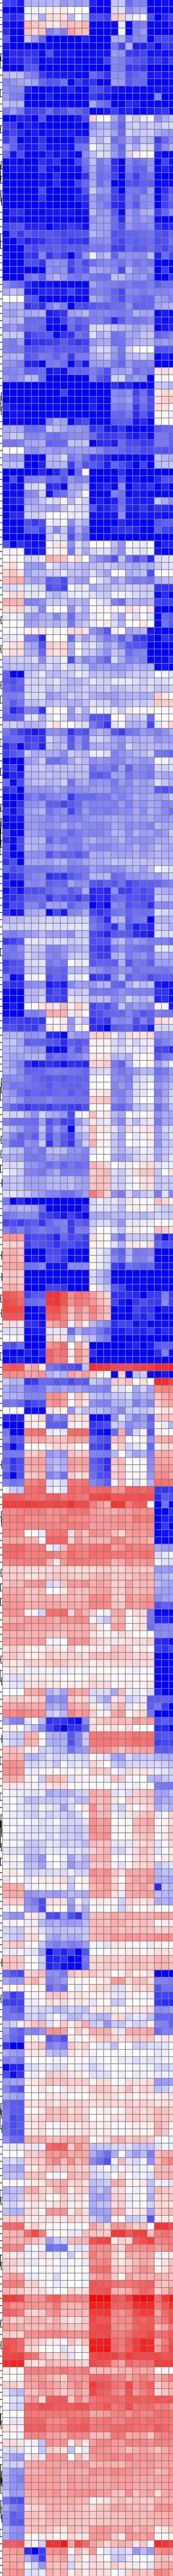

Supplement: 1471-2164-14-870-S19.pdf [file 1471-2164-14-870-S19.pdf]
